# Supplementary material for: Role of the pH in state-dependent blockade of hERG currents
Source: PubMed Central journal article supplement (PMC5059635; doi:10.1038/srep32536), 2016-10-12
Supplement: srep32536-s1.pdf [file srep32536-s1.pdf]

# Role of the pH in state-dependent blockade of hERG currents

Yibo Wang<sup>1</sup>, Jiqing Guo<sup>2</sup>, Laura L. Perissinotti<sup>1</sup>, James Lees-Miller<sup>2</sup>, Guoqi Teng<sup>2</sup>, Serdar Durdagi<sup>3</sup>, Henry J. Duff<sup>2\*</sup> and Sergei Yu. Noskov<sup>1\*</sup>

## Supporting Material

The error of calculation of the PMF was estimated based upon the variance of the reaction coordinate  $var(\bar{x}_i)$  in window  $i$  during umbrella sampling simulations<sup>1</sup>. **Equation 1** was employed for the error estimation of PMF  $G(x)$  along the reaction coordinate  $x$

$$var[G(x)] = (k\Delta r)^2 \cdot \sum_{i=1}^{\frac{x-r_0}{\Delta r}} var(\bar{x}_i) \quad (1)$$

where  $i$  is the number of window,  $\Delta r$  the distance between the center of the neighboring windows and  $k$  the force constant with  $10 \text{ kcal/mol} \cdot \text{\AA}^2$ . The variance of the reaction coordinate is obtained from block averaging. The total sampling data  $M$  in each window simulation is divided into 10 blocks of size  $B$ ,

$$M = 10 \cdot B$$

The average in each block is given as

$$\bar{x}_n = \frac{1}{B} \sum_{j=1}^B x_{j+(n-1)B} \quad \text{for } n = 1, \dots, 10$$

And the corresponding variance  $var(\bar{x})$  is

$$var(\bar{x}_i) = \frac{1}{n(n-1)} \sum_{n=1}^{10} (\bar{x}_n - \bar{x}_i)^2$$

From **Equation 1**, it clearly shows the accumulation of the statistical error along the reaction coordinate  $x$ .

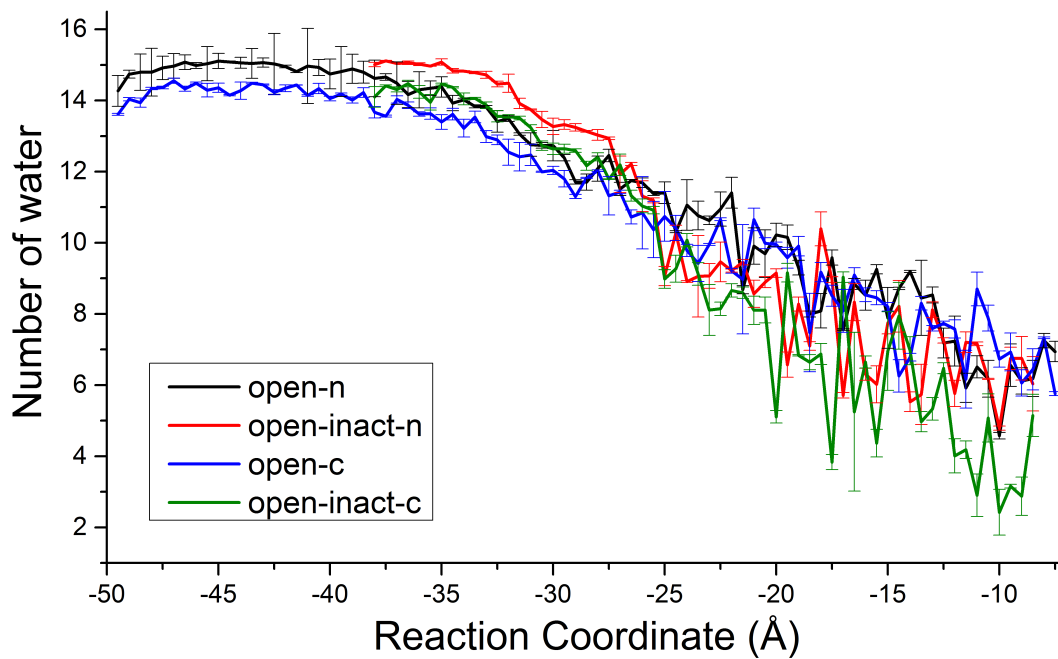

**Figure S1.** The number of water molecules within 3.5 Å of Nitrogen or Oxygen atoms of dofetilide were counted. The cationic dofetilide in open-inactivated hERG has at least two water molecules less than the other situations in the high-affinity binding site ( $z = -10$  Å).

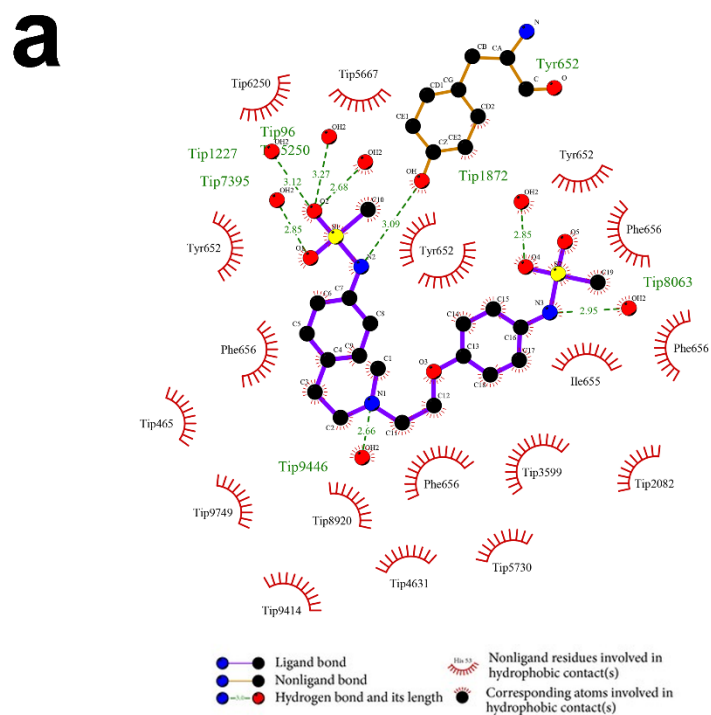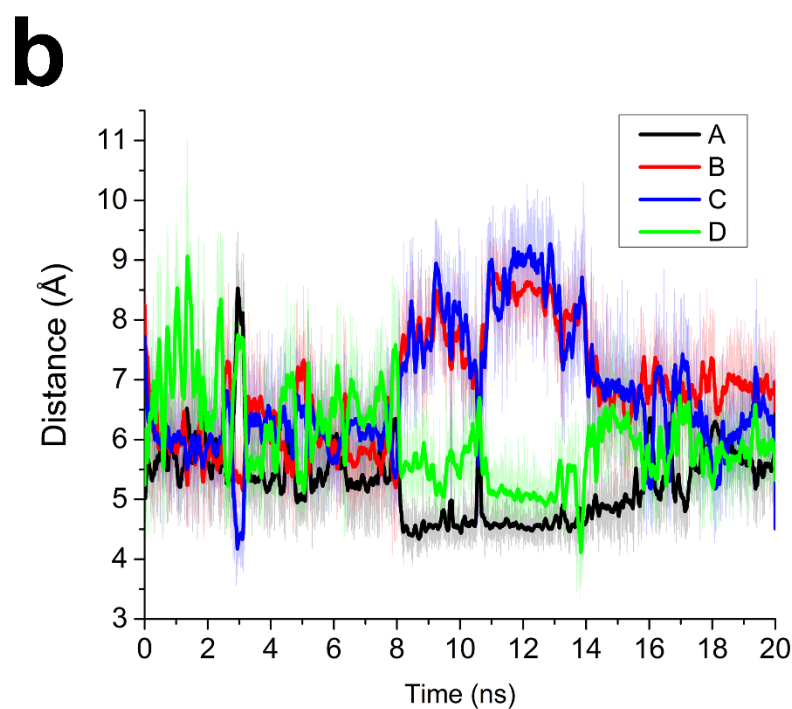

**Figure S2 a.** Schematic diagram of cationic dofetilide interactions generated by LigPlus <sup>2</sup>. Hydrogen bonds are in dashed green lines. Hydrophobic contacts with the ligand are presented by red semicircles with radiating spokes. **b.** Distance between the charged nitrogen of dofetilide and the center of the benzene ring of Phe656 from subunit A, B, C, and D.

## Reference

1. Zhu, F.Q. & Hummer, G. Convergence and error estimation in free energy calculations using the weighted histogram analysis method. *Journal of Computational Chemistry* **33**, 453-465 (2012).
2. Wallace, A.C., Laskowski, R.A. & Thornton, J.M. Ligplot - a Program to Generate Schematic Diagrams of Protein Ligand Interactions. *Protein Engineering* **8**, 127-134 (1995).
